# Supplementary material for: Development of photosynthetic carbon fixation model using multi-excitation wavelength fast repetition rate fluorometry in Lake Biwa
Source: PLOS journal article supplement (doi:10.1371/journal.pone.0238013), 2021-02-02
Supplement: S7 (10.1371/journal.pone.0238013.s007) [file journal.pone.0238013.s007]

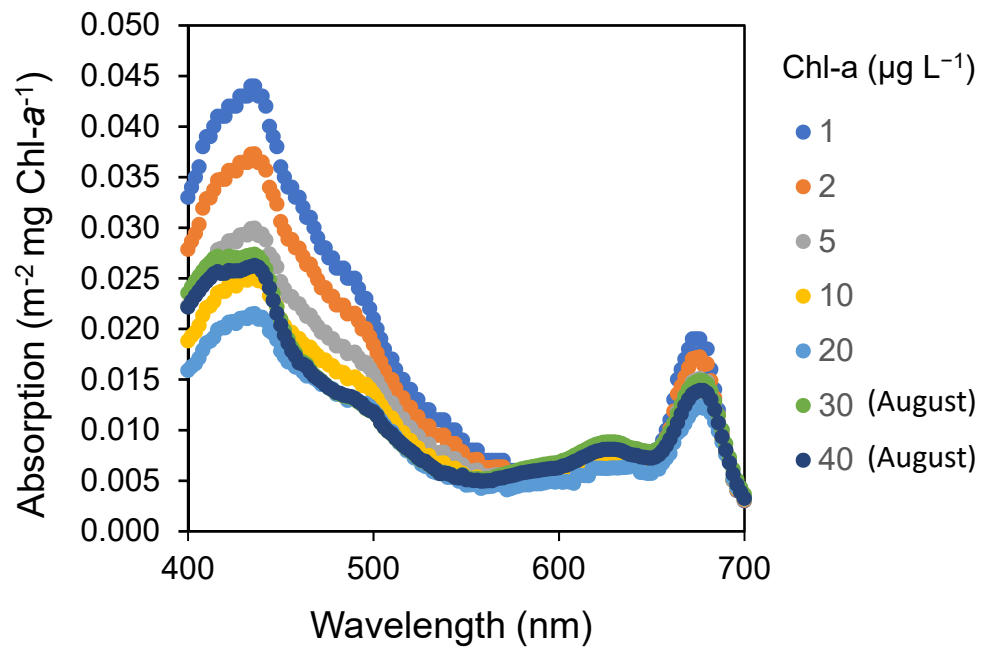

**S3 Appendix. Modeled absorption spectrum for various Chl-*a* concentrations.** The spectrum were calculated with Paavel's model [85] for 30 and 40 µg L<sup>-1</sup> in August, and Ylöstalo's model [86] for others.
